# Supplementary material for: Facile synthesis of Fe-containing metal–organic frameworks as highly efficient catalysts for degradation of phenol at neutral pH and ambient temperature
Source: Royal Society of Chemistry journal article supplement (doi:10.1039/c5ce01375e), 2015-01-01
Supplement: c5ce01375e1.pdf [file c5ce01375e1.pdf]

## *Supporting Information*

### **Facile Synthesis of Fe-containing Metal Organic Framework as Highly Efficient Catalyst for Degradation of Phenol at Neutral pH and Ambient Temperature**

Qiao Sun<sup>a</sup>, Min Liu<sup>a</sup>, Keyan Li<sup>a</sup>, Yi Zuo<sup>a</sup>, Junhu Wang<sup>b</sup>, Chunshan Song<sup>\*,a,c</sup>, Guoliang Zhang<sup>d</sup>, and Xinwen Guo<sup>\*,a</sup>

<sup>a</sup>State Key Laboratory of Fine Chemicals, PSU-DUT Joint Center for Energy Research, School of Chemical Engineering, Dalian University of Technology, Dalian 116024, People's Republic of China

<sup>b</sup>Mössbauer Effect Data Center, Dalian Institute of Chemical Physics, Chinese Academy of Sciences, Dalian, People's Republic of China

<sup>c</sup>EMS Energy Institute, PSU-DUT Joint Center for Energy Research and Department of Energy & Mineral Engineering, Pennsylvania State University, University Park, Pennsylvania 16802, United States

<sup>d</sup>College of Biological and Environmental Engineering, Zhejiang University of Technology, Hangzhou 310014, People's Republic of China

\*X. Guo. E-mail: guoxw@dlut.edu.cn; Fax: +86-0411-84986134; Tel: +86-0411-84986133

\*C. Song. E-mail: csong@psu.edu; Fax: +1-814-863-4466; Tel: +1-814-865-3573

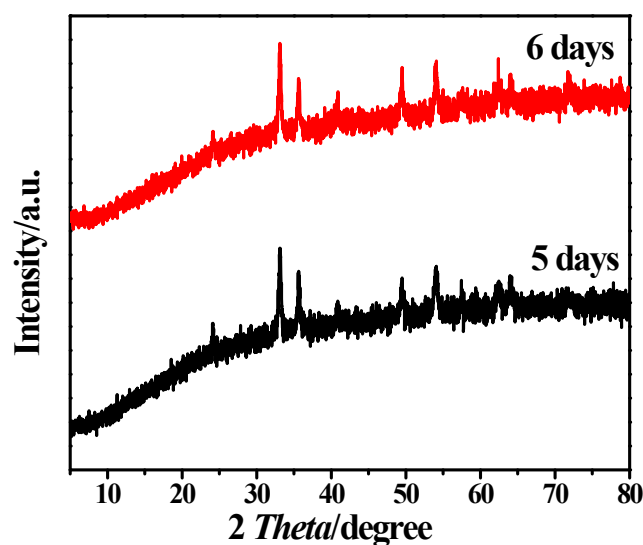

Fig. S1 Samples synthesized under agitation for 5 and 6 days

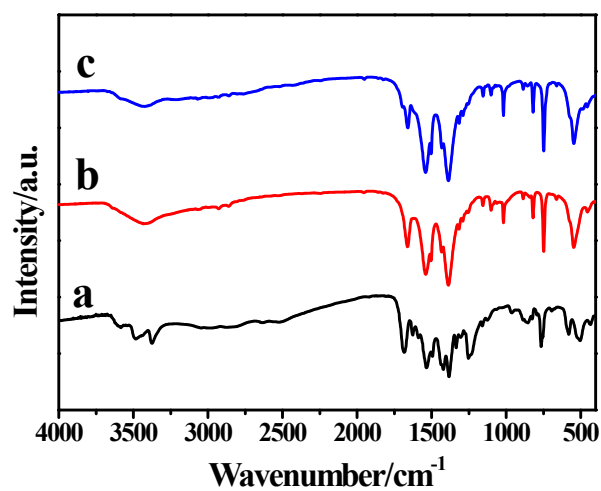

Fig. S2 FT-IR spectra of NH<sub>2</sub>-MIL-53(Fe) (a), MIL-53(Fe) (b) and Fe(BDC)(DMF,F)

(c)

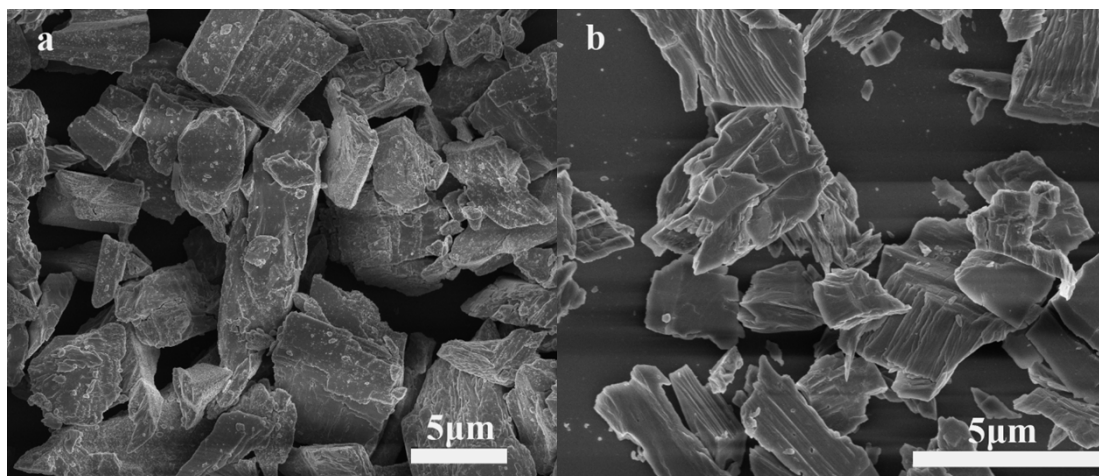

Figure. S3 SEM image of MIL-53(Fe) samples under static state: (a) as-synthesized,

(b) synthesized without HF
